# Supplementary material
Source: PubMed Central journal article supplement (PMC2494787)
Supplement: 00448.2007_4.pdf [file 00448.2007_4.pdf]

**Supplementary Figure 1. Effect of SOD overexpression on ceramide-induced reactive oxygen species.** **a.** Hydrogen peroxide (H<sub>2</sub>O<sub>2</sub>) levels in the bronchoalveolar (BAL) lavage of wild type (wt) or transgenic mice (Cu/Zn SOD Tg) after i-t. instillation of ceramide (Cer) (levels normalized by number of cells in the BAL, mean + SEM; p<0.001 Kruskal-Wallis ANOVA; # p<0.05 versus control; \* p<0.05 versus wt cer). **b.** Genotyping of Cu/Zn SOD mice. Microphotograph of DNA agarose gel. Lanes marked with IL-2 show internal control. Lanes marked SOD show expression in the mouse DNA of human Cu/Zn SOD gene as a 236 bp transcript.

**Supplementary Figure 2. Lung MMP-9 activity following ceramide instillation.** Densitometric measurements of MMP-9 activity in mice receiving intra-tracheal vehicle (lanes 1-4) compared to those receiving ceramide (lanes 5-10; C12:0 1 mg/kg; 48h), using gelatin zymography (shown as digested white bands on the dark background of the Coomassie-stained gel). Mean + SD (p=0.007)

**Supplementary Figure 3. Schematic of the putative crosstalk of ceramide-induced oxidative stress and apoptosis causing alveolar destruction in the lung.** Cigarette smoke, like VEGF receptor inhibition, upregulated lung ceramides. Ceramide augmentation increased reactive oxygen species in the lung, coupled with an inhibition of anti-oxidant enzyme activity, such as superoxide dismutase (SOD). Ceramide triggered ROS-dependent caspase-3 and ASMase activation, the latter causing further increases in lung ceramides. While caspase inhibition augmented the mitochondrial superoxide dismutase activity, overexpression of Cu/Zn SOD decreased ceramide-induced ASMase and caspase-3 activation and protected the lung

against ceramide-induced alveolar destruction, as it protected against cigarette smoke-induced emphysema.
