# Supplementary material
Source: PubMed Central journal article supplement (PMC2494787)

Supplementary Figure 1 a

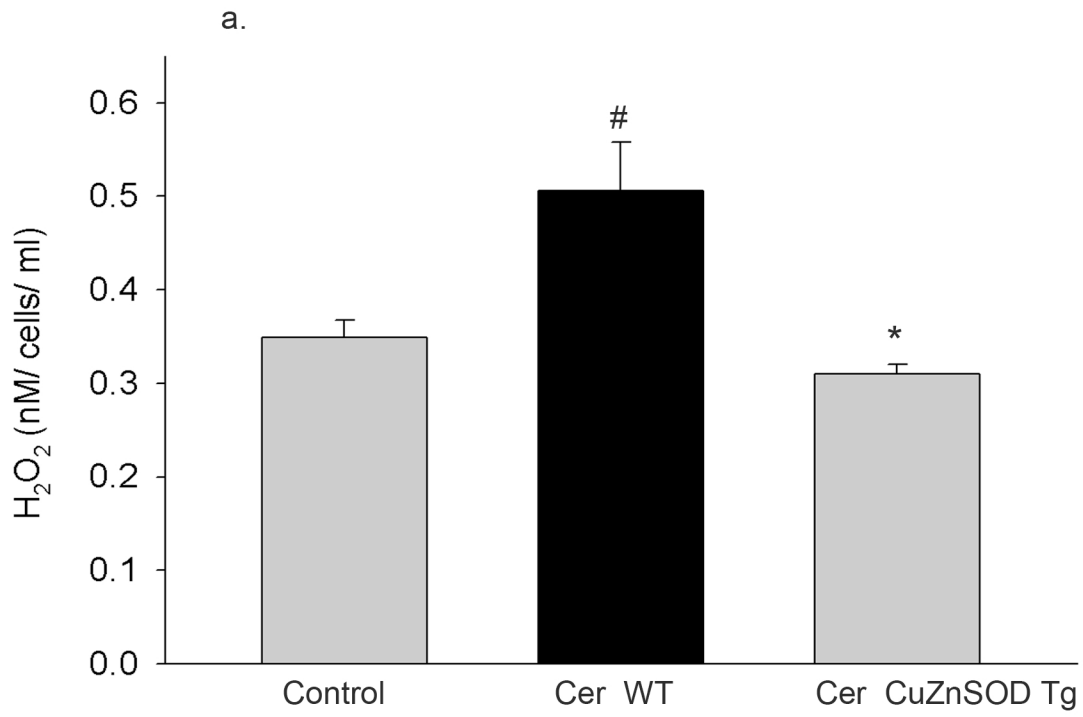

Supplementary Fig 1b

b.

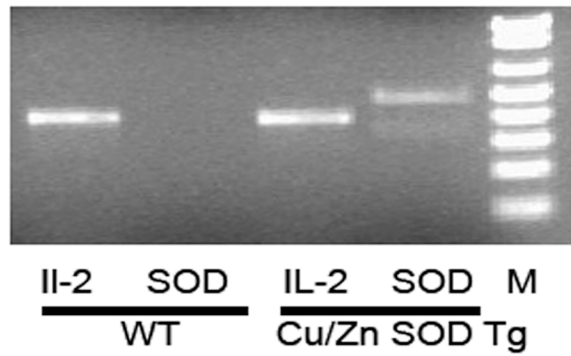

Supplement: 00448.2007_1.pdf [file 00448.2007_1.pdf]

Supplementary Figure 2

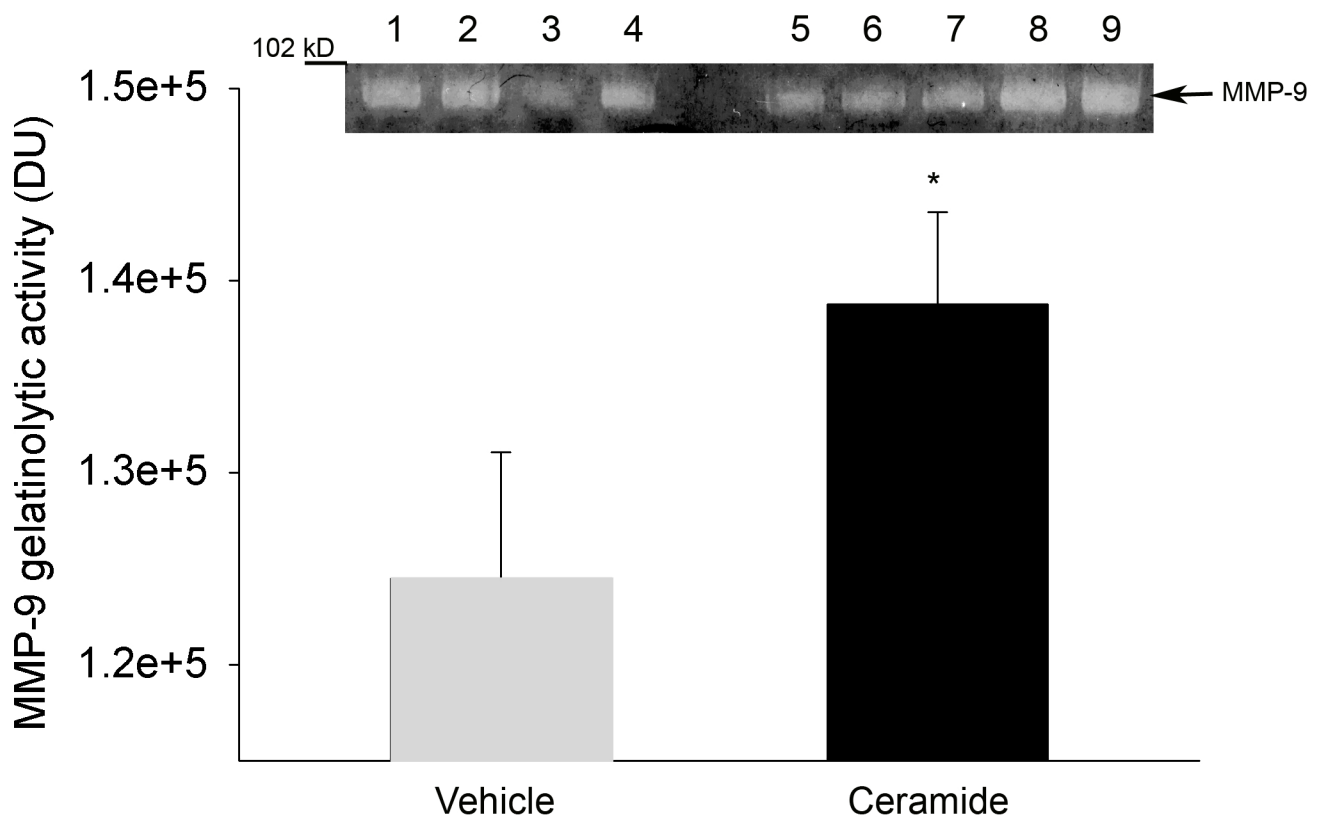

Supplement: 00448.2007_2.pdf [file 00448.2007_2.pdf]

Supplementary figure 3.

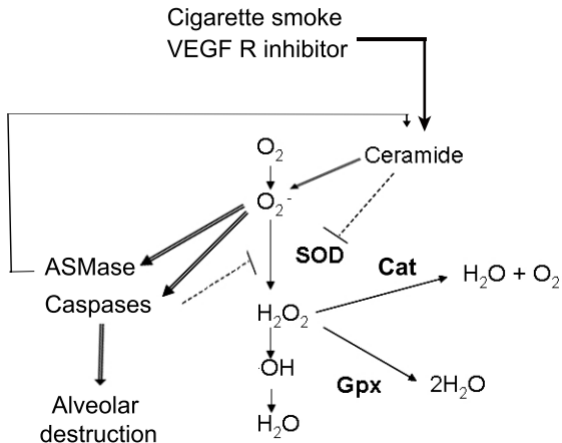

Supplement: 00448.2007_3.pdf [file 00448.2007_3.pdf]
